# Supplementary material
Source: publisher site journal article supplement (https://www.kjim.org/upload/media/kjim-2018-438-suppl3.pdf)
Supplement: Supplementary file 1 [file kjim-2018-438-suppl3.pdf]

**Supplementary Table 3. Univariate analysis for in-hospital mortality in derivation and validation cohorts**

| Characteristic                                        | Derivation cohort             | Validation cohort               |
|-------------------------------------------------------|-------------------------------|---------------------------------|
|                                                       | OR (95% CI)                   | OR (95% CI)                     |
| Age, yr                                               | 1.00 (0.98–1.02)              | 1.00 (0.99–1.01)                |
| Male sex                                              | 0.79 (0.46–1.36)              | 1.24 (0.79–1.95)                |
| Underlying malignancies                               |                               |                                 |
| Acute myeloid leukemia                                | 0.91 (0.53–1.54)              | 0.71 (0.45–1.14)                |
| Acute lymphoblastic leukemia                          | 1.21 (0.58–2.53)              | 1.50 (0.78–2.87)                |
| Chronic lymphoblastic leukemia                        | 0.61 (0.10–3.74)              | 1.12 (0.98–2.02)                |
| Lymphoma                                              | 0.81 (0.41–1.59)              | 0.81 (0.50–1.30)                |
| Myeloma                                               | 2.25 (0.57–8.92)              | 0.68 (0.30–1.56)                |
| Aplastic anemia                                       | 0.23 (0.03–2.10)              | 0.89 (0.18–4.49)                |
| Myelodysplasia                                        | 1.67 (0.63–4.40)              | 2.68 (0.98–5.74)                |
| Comorbidity                                           |                               |                                 |
| Chronic lung disease                                  | 0.61 (0.10–3.74)              | 3.22 (0.66–15.74)               |
| Chronic heart disease                                 | 0.62 (0.34–1.14)              | 0.77 (0.44–1.34)                |
| Chronic renal disease                                 | 0.30 (0.03–3.00)              | 0.89 (0.22–3.62)                |
| Chronic liver disease                                 | 2.20 (0.65–7.32)              | 0.76 (0.25–2.31)                |
| Cerebral vascular disease                             | 0.93 (0.31–2.73)              | 0.66 (0.15–3.02)                |
| Disease status at admission                           |                               |                                 |
| Newly diagnosis                                       | 0.66 (0.35–1.30)              | 1.82 (0.99–3.33)                |
| Relapsed/refractory                                   | 1.55 (0.91–2.66)              | 0.78 (0.49–1.24)                |
| Partial remission                                     | 2.84 (0.30–27.71)             | 1.16 (0.42–3.20)                |
| Complete remission                                    | 0.78 (0.35–1.73)              | 0.73 (0.37–1.46)                |
| BMT/HSCT recipient                                    | 1.68 (0.98–2.90)              | 1.23 (0.78–1.93)                |
| ECOG performance status                               | 0.87 (0.65–1.20)              | 1.70 (1.38–2.08) <sup>a</sup>   |
| Major reasons for MET activation                      |                               |                                 |
| Respiratory distress                                  | 2.08 (1.21–3.60) <sup>b</sup> | 1.67 (1.07–2.60) <sup>b</sup>   |
| Sepsis/septic shock                                   | 0.86 (0.50–1.60)              | 0.61 (0.35–1.01)                |
| Hypovolemic shock                                     | 0.36 (0.07–1.90)              | 2.13 (0.54–8.40)                |
| Altered mental status                                 | 0.93 (0.26–3.30)              | 1.49 (0.60–3.70)                |
| Metabolic acidosis                                    | 0.30 (0.07–1.00)              | 0.80 (0.33–1.94)                |
| Laboratory at MET activation                          |                               |                                 |
| Lactic acid, mmol/L                                   | 0.97 (0.89–1.04)              | 1.04 (0.96–1.13)                |
| Neutropenia <sup>c</sup>                              | 0.91 (0.54–1.56)              | 1.16 (0.67–2.00)                |
| Modified early warning score                          | 1.34 (1.20–1.57) <sup>a</sup> | 1.28 (1.14–1.42) <sup>a</sup>   |
| SpO <sub>2</sub> /FiO <sub>2</sub> score <sup>d</sup> | 1.80 (1.45–2.22) <sup>a</sup> | 1.74 (1.47–2.10) <sup>a</sup>   |
| qSOFA score                                           | 1.07 (0.65–1.77)              | 0.94 (0.66–1.33)                |
| SOFA score                                            | 1.13 (1.02–1.24) <sup>b</sup> | 1.27 (1.16–1.39) <sup>b</sup>   |
| NFR after MET activation                              | 2.00 (1.04–3.81) <sup>b</sup> | 12.21 (6.93–21.53) <sup>a</sup> |

OR, odds ratio; CI, confidence interval; BMT, bone marrow transplantation; HSCT, hematopoietic stem cell transplantation; ECOG, Eastern Cooperative Oncology Group; MET, medical emergency team; qSOFA, quick sequential organ failure assessment; SOFA, sequential organ failure assessment; NFR, not for resuscitation.

<sup>a</sup> $p < 0.001$ .

<sup>b</sup> $p < 0.05$ .

<sup>c</sup>Neutropenia, absolute neutrophil count  $< 500/\mu\text{L}$ .

<sup>d</sup>SpO<sub>2</sub>/FiO<sub>2</sub> score, 0 points for  $> 315$ , 2 points for  $\leq 315$  SpO<sub>2</sub>/FiO<sub>2</sub> ratio  $< 235$ , 3 points for  $\leq 235$ .
